# Supplementary material for: Synthesis, crystal structure and theoretical calculations of two rare-earth borates with DUV cut-off edges
Source: Royal Society of Chemistry journal article supplement (doi:10.1039/d0nj05763k), 2021-01-01

## Supplementary Information (SI)

### **Synthesis, crystal structure and theoretical calculations of two rare-earth borates with DUV cut-off edges**

Qin Ma,<sup>a</sup> Tinghao Tong,<sup>b</sup> and Zhi Su<sup>a,\*</sup>

<sup>a</sup> College of Chemistry and Chemical Engineering, Xinjiang Normal University, Urumqi, 102  
Xinyi Road, Xinjiang 830054, P.R. China.

<sup>b</sup> Department of Physical Science and Technology, Xinjiang University, Urumqi, Xinjiang 830046,  
P. R China.

\* Corresponding author, E-mail: [suzhixj@sina.com](mailto:suzhixj@sina.com)

**Table S1.** Atomic coordinates ( $\times 10^4$ ) and equivalent isotropic displacement parameters ( $\text{\AA}^2 \times 10^3$ ) for  $\text{YZnB}_5\text{O}_{10}$ .  $U(\text{eq})$  is defined as one-third of the trace of the orthogonalized  $U_{ij}$  tensor.

| <b>Atoms</b> | <b><i>x/a</i></b> | <b><i>y/b</i></b> | <b><i>z/c</i></b> | <b>U(e q)</b> | <b>BVS</b>  |
|--------------|-------------------|-------------------|-------------------|---------------|-------------|
| <b>Y(1)</b>  | 8154(1)           | 6813(1)           | 7597(1)           | 6(1)          | <b>3.00</b> |
| <b>Zn(1)</b> | 8943(1)           | 5915(1)           | 3728(1)           | 7(1)          | <b>1.89</b> |
| <b>B(1)</b>  | 5648(2)           | 6877(2)           | 888(2)            | 6(1)          | <b>2.92</b> |
| <b>B(2)</b>  | 7772(2)           | 4680(2)           | 577(2)            | 6(1)          | <b>3.00</b> |
| <b>B(3)</b>  | 5825(2)           | 4270(2)           | 2466(2)           | 6(1)          | <b>3.00</b> |
| <b>B(4)</b>  | 4815(2)           | 1758(2)           | 3973(2)           | 5(1)          | <b>3.03</b> |
| <b>B(5)</b>  | 6613(2)           | 3971(2)           | 5096(2)           | 6(1)          | <b>3.05</b> |
| <b>O(1)</b>  | 4917(1)           | 8481(2)           | 709(1)            | 7(1)          | <b>1.81</b> |
| <b>O(2)</b>  | 6808(1)           | 6253(2)           | 96(1)             | 7(1)          | <b>1.89</b> |
| <b>O(3)</b>  | 8233(1)           | 3911(2)           | -791(1)           | 6(1)          | <b>2.09</b> |
| <b>O(4)</b>  | 6818(1)           | 3515(2)           | 1400(1)           | 6(1)          | <b>2.01</b> |
| <b>O(5)</b>  | 5106(1)           | 5932(2)           | 1997(1)           | 7(1)          | <b>2.15</b> |
| <b>O(6)</b>  | 4609(1)           | 2980(2)           | 2750(1)           | 6(1)          | <b>2.06</b> |
| <b>O(7)</b>  | 6839(1)           | 4680(2)           | 3782(1)           | 7(1)          | <b>2.04</b> |
| <b>O(8)</b>  | 5832(1)           | 300(2)            | 3493(1)           | 6(1)          | <b>1.87</b> |
| <b>O(9)</b>  | 7459(1)           | 4423(2)           | 6293(1)           | 7(1)          | <b>1.87</b> |
| <b>O(10)</b> | 5476(1)           | 2677(2)           | 5236(1)           | 6(1)          | <b>2.09</b> |

**Table S2.** Atomic coordinates ( $\times 10^4$ ) and equivalent isotropic displacement parameters ( $\text{\AA}^2 \times 10^3$ ) for  $\text{GdZnB}_5\text{O}_{10}$ .  $U(\text{eq})$  is defined as one-third of the trace of the orthogonalized  $U_{ij}$  tensor.

| Atoms        | $x/a$    | $y/b$   | $z/c$   | $U(\text{e q})$ | BVS  |
|--------------|----------|---------|---------|-----------------|------|
| <b>Gd(1)</b> | 4463(1)  | 6825(1) | 2624(1) | 5(1)            | 2.94 |
| <b>Zn(1)</b> | 9824(1)  | 5898(1) | 8748(1) | 7(1)            | 1.91 |
| <b>B(1)</b>  | 7753(7)  | 4677(7) | 5540(5) | 5(1)            | 2.96 |
| <b>B(2)</b>  | 5887(8)  | 6739(6) | 6062(6) | 4(1)            | 3.06 |
| <b>B(3)</b>  | 10193(8) | 6877(6) | 5870(6) | 5(1)            | 3.09 |
| <b>B(4)</b>  | 11583(8) | 4243(6) | 7406(5) | 5(1)            | 3.09 |
| <b>B(5)</b>  | 6530(8)  | 8990(6) | 4960(5) | 5(1)            | 3.05 |
| <b>O(1)</b>  | 7323(4)  | 5276(4) | 6480(3) | 5(1)            | 1.82 |
| <b>O(2)</b>  | 9521(5)  | 3505(4) | 6347(3) | 5(1)            | 2.09 |
| <b>O(3)</b>  | 5239(5)  | 7718(4) | 4813(3) | 4(1)            | 1.94 |
| <b>O(4)</b>  | 6967(5)  | 7915(4) | 7316(3) | 5(1)            | 2.10 |
| <b>O(5)</b>  | 11890(5) | 4663(4) | 8721(3) | 6(1)            | 2.04 |
| <b>O(6)</b>  | 10751(5) | 8477(4) | 5708(3) | 6(1)            | 2.13 |
| <b>O(7)</b>  | 6160(5)  | 9495(4) | 3772(3) | 7(1)            | 2.06 |
| <b>O(8)</b>  | 5924(5)  | 3929(4) | 4175(3) | 5(1)            | 2.03 |
| <b>O(9)</b>  | 8259(5)  | 6272(4) | 5096(3) | 7(1)            | 1.94 |
| <b>O(10)</b> | 11837(5) | 5893(4) | 6945(3) | 6(1)            | 1.94 |

**Table S3.** Bond lengths [Å] and angles [deg] for YZnB<sub>5</sub>O<sub>10</sub>.

|                     |             |                     |            |
|---------------------|-------------|---------------------|------------|
| Y(1)-O(9)           | 2.2444(12)  | B(1)-O(5)           | 1.366(2)   |
| Y(1)-O(9)#1         | 2.3124(12)  | B(1)-O(1)           | 1.373(2)   |
| Y(1)-O(6)#2         | 2.3598(12)  | B(2)-O(4)           | 1.455(2)   |
| Y(1)-O(10)#1        | 2.3637(12)  | B(2)-O(3)           | 1.482(2)   |
| Y(1)-O(1)#3         | 2.4024(12)  | B(2)-O(2)           | 1.501(2)   |
| Y(1)-O(5)#3         | 2.4768(12)  | B(2)-O(8)#4         | 1.502(2)   |
| Y(1)-O(3)#4         | 2.5545(12)  | B(3)-O(5)           | 1.458(2)   |
| Y(1)-O(3)#5         | 2.6678(12)  | B(3)-O(6)           | 1.462(2)   |
| Y(1)-O(2)#5         | 2.7034(12)  | B(3)-O(4)           | 1.466(2)   |
| Y(1)-O(8)#6         | 2.8689(12)  | B(3)-O(7)           | 1.490(2)   |
| Zn(1)-O(7)          | 2.0265(12)  | B(4)-O(10)          | 1.454(2)   |
| Zn(1)-O(1)#3        | 2.0318(13)  | B(4)-O(3)#8         | 1.471(2)   |
| Zn(1)-O(4)#4        | 2.0794(12)  | B(4)-O(6)           | 1.474(2)   |
| Zn(1)-O(1)#7        | 2.1374(12)  | B(4)-O(8)           | 1.493(2)   |
| Zn(1)-O(8)#4        | 2.1503(12)  | B(5)-O(9)           | 1.337(2)   |
| Zn(1)-O(6)#4        | 2.4731(12)  | B(5)-O(7)           | 1.366(2)   |
| B(1)-O(2)           | 1.359(2)    | B(5)-O(10)          | 1.391(2)   |
| O(9)-Y(1)-O(9)#1    | 151.341(13) | O(3)#4-Y(1)-O(8)#6  | 150.04(4)  |
| O(9)-Y(1)-O(6)#2    | 75.74(4)    | O(3)#5-Y(1)-O(8)#6  | 51.91(3)   |
| O(9)#1-Y(1)-O(6)#2  | 75.65(4)    | O(2)#5-Y(1)-O(8)#6  | 91.92(3)   |
| O(9)-Y(1)-O(10)#1   | 142.01(4)   | O(7)-Zn(1)-O(1)#3   | 113.01(5)  |
| O(9)#1-Y(1)-O(10)#1 | 59.39(4)    | O(7)-Zn(1)-O(4)#4   | 99.66(5)   |
| O(6)#2-Y(1)-O(10)#1 | 122.09(4)   | O(1)#3-Zn(1)-O(4)#4 | 86.88(5)   |
| O(9)-Y(1)-O(1)#3    | 71.39(4)    | O(7)-Zn(1)-O(1)#7   | 88.97(5)   |
| O(9)#1-Y(1)-O(1)#3  | 125.44(4)   | O(1)#3-Zn(1)-O(1)#7 | 79.57(5)   |
| O(6)#2-Y(1)-O(1)#3  | 124.81(4)   | O(4)#4-Zn(1)-O(1)#7 | 165.99(5)  |
| O(10)#1-Y(1)-O(1)#3 | 111.02(4)   | O(7)-Zn(1)-O(8)#4   | 93.34(5)   |
| O(9)-Y(1)-O(5)#3    | 126.38(4)   | O(1)#3-Zn(1)-O(8)#4 | 150.81(5)  |
| O(9)#1-Y(1)-O(5)#3  | 71.57(4)    | O(4)#4-Zn(1)-O(8)#4 | 101.39(5)  |
| O(6)#2-Y(1)-O(5)#3  | 126.94(4)   | O(1)#7-Zn(1)-O(8)#4 | 89.00(5)   |
| O(10)#1-Y(1)-O(5)#3 | 72.62(4)    | O(7)-Zn(1)-O(6)#4   | 141.42(5)  |
| O(1)#3-Y(1)-O(5)#3  | 55.69(4)    | O(1)#3-Zn(1)-O(6)#4 | 100.23(4)  |
| O(9)-Y(1)-O(3)#4    | 92.93(4)    | O(4)#4-Zn(1)-O(6)#4 | 62.00(4)   |
| O(9)#1-Y(1)-O(3)#4  | 69.75(4)    | O(1)#7-Zn(1)-O(6)#4 | 116.80(4)  |
| O(6)#2-Y(1)-O(3)#4  | 56.89(4)    | O(8)#4-Zn(1)-O(6)#4 | 61.21(4)   |
| O(10)#1-Y(1)-O(3)#4 | 125.06(4)   | O(2)-B(1)-O(5)      | 121.62(15) |
| O(1)#3-Y(1)-O(3)#4  | 81.73(4)    | O(2)-B(1)-O(1)      | 125.69(16) |
| O(5)#3-Y(1)-O(3)#4  | 72.96(4)    | O(5)-B(1)-O(1)      | 112.68(15) |
| O(9)-Y(1)-O(3)#5    | 68.59(4)    | O(4)-B(2)-O(3)      | 113.94(14) |
| O(9)#1-Y(1)-O(3)#5  | 116.90(4)   | O(4)-B(2)-O(2)      | 109.19(13) |
| O(6)#2-Y(1)-O(3)#5  | 96.93(4)    | O(3)-B(2)-O(2)      | 103.05(13) |
| O(10)#1-Y(1)-O(3)#5 | 75.67(4)    | O(4)-B(2)-O(8)#4    | 109.38(14) |

|                     |           |                   |            |
|---------------------|-----------|-------------------|------------|
| O(1)#3-Y(1)-O(3)#5  | 110.17(4) | O(3)-B(2)-O(8)#4  | 112.27(13) |
| O(5)#3-Y(1)-O(3)#5  | 134.97(4) | O(2)-B(2)-O(8)#4  | 108.71(13) |
| O(3)#4-Y(1)-O(3)#5  | 151.89(2) | O(5)-B(3)-O(6)    | 110.24(13) |
| O(9)-Y(1)-O(2)#5    | 103.34(4) | O(5)-B(3)-O(4)    | 112.54(14) |
| O(9)#1-Y(1)-O(2)#5  | 68.04(4)  | O(6)-B(3)-O(4)    | 108.01(13) |
| O(6)#2-Y(1)-O(2)#5  | 69.75(4)  | O(5)-B(3)-O(7)    | 106.09(13) |
| O(10)#1-Y(1)-O(2)#5 | 61.07(4)  | O(6)-B(3)-O(7)    | 111.68(14) |
| O(1)#3-Y(1)-O(2)#5  | 160.36(4) | O(4)-B(3)-O(7)    | 108.31(13) |
| O(5)#3-Y(1)-O(2)#5  | 129.33(4) | O(10)-B(4)-O(3)#8 | 110.72(14) |
| O(3)#4-Y(1)-O(2)#5  | 117.76(4) | O(10)-B(4)-O(6)   | 110.40(13) |
| O(3)#5-Y(1)-O(2)#5  | 51.54(4)  | O(3)#8-B(4)-O(6)  | 105.69(13) |
| O(9)-Y(1)-O(8)#6    | 83.28(4)  | O(10)-B(4)-O(8)   | 113.48(13) |
| O(9)#1-Y(1)-O(8)#6  | 123.15(4) | O(3)#8-B(4)-O(8)  | 110.14(13) |
| O(6)#2-Y(1)-O(8)#6  | 147.59(4) | O(6)-B(4)-O(8)    | 106.02(13) |
| O(10)#1-Y(1)-O(8)#6 | 64.31(4)  | O(9)-B(5)-O(7)    | 123.52(15) |
| O(1)#3-Y(1)-O(8)#6  | 68.86(4)  | O(9)-B(5)-O(10)   | 116.25(15) |
| O(5)#3-Y(1)-O(8)#6  | 85.42(4)  | O(7)-B(5)-O(10)   | 120.22(15) |

Symmetry transformations used to generate equivalent atoms:

|                             |                            |
|-----------------------------|----------------------------|
| #1 $-x+3/2, y+1/2, -z+3/2$  | #2 $-x+1, -y+1, -z+1$      |
| #3 $x+1/2, -y+3/2, z+1/2$   | #4 $-x+3/2, y+1/2, -z+1/2$ |
| #5 $x, y, z+1$              | #6 $x+1/2, -y+1/2, z+1/2$  |
| #7 $-x+3/2, y-1/2, -z+1/2$  | #8 $x-1/2, -y+1/2, z+1/2$  |
| #9 $-x+2, -y+1, -z+1$       | #10 $x-1/2, -y+3/2, z-1/2$ |
| #11 $-x+3/2, y-1/2, -z+3/2$ | #12 $x, y, z-1$            |
| #13 $x+1/2, -y+1/2, z-1/2$  | #14 $x-1/2, -y+1/2, z-1/2$ |

**Table S4.** Bond lengths [ $\text{\AA}$ ] and angles [deg] for  $\text{GdZnB}_5\text{O}_{10}$ .

|                             |             |                              |            |
|-----------------------------|-------------|------------------------------|------------|
| <b>Gd(1)-O(1)</b>           | 2.2778(17)  | <b>B(1)-O(5)</b>             | 1.472(3)   |
| <b>Gd(1)-O(1)#1</b>         | 2.3580(17)  | <b>B(1)-O(4)</b>             | 1.474(3)   |
| <b>Gd(1)-O(2)#1</b>         | 2.4175(17)  | <b>B(1)-O(3)</b>             | 1.487(3)   |
| <b>Gd(1)-O(5)#2</b>         | 2.4201(18)  | <b>B(2)-O(1)</b>             | 1.336(3)   |
| <b>Gd(1)-O(10)#3</b>        | 2.4512(18)  | <b>B(2)-O(6)</b>             | 1.365(3)   |
| <b>Gd(1)-O(7)#3</b>         | 2.5124(17)  | <b>B(2)-O(2)</b>             | 1.392(3)   |
| <b>Gd(1)-O(4)#2</b>         | 2.5782(17)  | <b>B(3)-O(7)</b>             | 1.459(3)   |
| <b>Gd(1)-O(4)#4</b>         | 2.6358(17)  | <b>B(3)-O(8)</b>             | 1.463(3)   |
| <b>Gd(1)-O(9)#5</b>         | 2.6742(18)  | <b>B(3)-O(5)</b>             | 1.467(3)   |
| <b>Gd(1)-O(3)#4</b>         | 2.8841(17)  | <b>B(3)-O(6)</b>             | 1.495(3)   |
| <b>Zn(1)-O(6)</b>           | 2.0304(17)  | <b>B(4)-O(8)</b>             | 1.453(3)   |
| <b>Zn(1)-O(10)#3</b>        | 2.0491(18)  | <b>B(4)-O(4)#8</b>           | 1.483(3)   |
| <b>Zn(1)-O(8)#6</b>         | 2.0813(18)  | <b>B(4)-O(3)#6</b>           | 1.496(3)   |
| <b>Zn(1)-O(10)#7</b>        | 2.1147(18)  | <b>B(4)-O(9)</b>             | 1.501(3)   |
| <b>Zn(1)-O(3)#6</b>         | 2.1962(17)  | <b>B(5)-O(9)</b>             | 1.359(3)   |
| <b>Zn(1)-O(5)#6</b>         | 2.4216(18)  | <b>B(5)-O(7)</b>             | 1.369(3)   |
| <b>B(1)-O(2)</b>            | 1.456(3)    | <b>B(5)-O(10)</b>            | 1.374(3)   |
| <b>O(1)-Gd(1)-O(1)#1</b>    | 150.685(19) | <b>O(4)#2-Gd(1)-O(3)#4</b>   | 150.42(5)  |
| <b>O(1)-Gd(1)-O(2)#1</b>    | 145.14(6)   | <b>O(4)#4-Gd(1)-O(3)#4</b>   | 51.85(5)   |
| <b>O(1)#1-Gd(1)-O(2)#1</b>  | 58.32(6)    | <b>O(9)#5-Gd(1)-O(3)#4</b>   | 91.87(5)   |
| <b>O(1)-Gd(1)-O(5)#2</b>    | 74.96(6)    | <b>O(6)-Zn(1)-O(10)#3</b>    | 116.87(7)  |
| <b>O(1)#1-Gd(1)-O(5)#2</b>  | 76.03(6)    | <b>O(6)-Zn(1)-O(8)#6</b>     | 99.50(7)   |
| <b>O(2)#1-Gd(1)-O(5)#2</b>  | 121.64(6)   | <b>O(10)#3-Zn(1)-O(8)#6</b>  | 86.52(7)   |
| <b>O(1)-Gd(1)-O(10)#3</b>   | 71.09(6)    | <b>O(6)-Zn(1)-O(10)#7</b>    | 89.52(7)   |
| <b>O(1)#1-Gd(1)-O(10)#3</b> | 124.89(6)   | <b>O(10)#3-Zn(1)-O(10)#7</b> | 79.28(8)   |
| <b>O(2)#1-Gd(1)-O(10)#3</b> | 110.23(6)   | <b>O(8)#6-Zn(1)-O(10)#7</b>  | 165.53(7)  |
| <b>O(5)#2-Gd(1)-O(10)#3</b> | 125.83(6)   | <b>O(6)-Zn(1)-O(3)#6</b>     | 91.27(7)   |
| <b>O(1)-Gd(1)-O(7)#3</b>    | 124.37(6)   | <b>O(10)#3-Zn(1)-O(3)#6</b>  | 149.06(7)  |
| <b>O(1)#1-Gd(1)-O(7)#3</b>  | 71.19(6)    | <b>O(8)#6-Zn(1)-O(3)#6</b>   | 102.04(7)  |
| <b>O(2)#1-Gd(1)-O(7)#3</b>  | 73.50(6)    | <b>O(10)#7-Zn(1)-O(3)#6</b>  | 88.95(7)   |
| <b>O(5)#2-Gd(1)-O(7)#3</b>  | 125.74(6)   | <b>O(6)-Zn(1)-O(5)#6</b>     | 139.93(7)  |
| <b>O(10)#3-Gd(1)-O(7)#3</b> | 54.88(6)    | <b>O(10)#3-Zn(1)-O(5)#6</b>  | 98.55(7)   |
| <b>O(1)-Gd(1)-O(4)#2</b>    | 89.69(6)    | <b>O(8)#6-Zn(1)-O(5)#6</b>   | 62.76(7)   |
| <b>O(1)#1-Gd(1)-O(4)#2</b>  | 70.56(6)    | <b>O(10)#7-Zn(1)-O(5)#6</b>  | 116.37(7)  |
| <b>O(2)#1-Gd(1)-O(4)#2</b>  | 125.16(5)   | <b>O(3)#6-Zn(1)-O(5)#6</b>   | 61.27(6)   |
| <b>O(5)#2-Gd(1)-O(4)#2</b>  | 56.15(6)    | <b>O(2)-B(1)-O(5)</b>        | 110.55(19) |
| <b>O(10)#3-Gd(1)-O(4)#2</b> | 82.57(6)    | <b>O(2)-B(1)-O(4)</b>        | 110.1(2)   |
| <b>O(7)#3-Gd(1)-O(4)#2</b>  | 72.51(5)    | <b>O(5)-B(1)-O(4)</b>        | 106.2(2)   |
| <b>O(1)-Gd(1)-O(4)#4</b>    | 70.66(6)    | <b>O(2)-B(1)-O(3)</b>        | 114.0(2)   |
| <b>O(1)#1-Gd(1)-O(4)#4</b>  | 117.62(6)   | <b>O(5)-B(1)-O(3)</b>        | 105.8(2)   |
| <b>O(2)#1-Gd(1)-O(4)#4</b>  | 76.52(6)    | <b>O(4)-B(1)-O(3)</b>        | 109.83(19) |
| <b>O(5)#2-Gd(1)-O(4)#4</b>  | 97.54(5)    | <b>O(1)-B(2)-O(6)</b>        | 122.9(2)   |

|                             |           |                    |            |
|-----------------------------|-----------|--------------------|------------|
| <b>O(10)#3-Gd(1)-O(4)#4</b> | 109.06(6) | O(1)-B(2)-O(2)     | 117.1(2)   |
| <b>O(7)#3-Gd(1)-O(4)#4</b>  | 135.82(5) | O(6)-B(2)-O(2)     | 120.0(2)   |
| <b>O(4)#2-Gd(1)-O(4)#4</b>  | 151.30(3) | O(7)-B(3)-O(8)     | 112.6(2)   |
| <b>O(1)-Gd(1)-O(9)#5</b>    | 104.63(6) | O(7)-B(3)-O(5)     | 110.7(2)   |
| <b>O(1)#1-Gd(1)-O(9)#5</b>  | 68.45(6)  | O(8)-B(3)-O(5)     | 107.5(2)   |
| <b>O(2)#1-Gd(1)-O(9)#5</b>  | 61.57(6)  | O(7)-B(3)-O(6)     | 105.93(19) |
| <b>O(5)#2-Gd(1)-O(9)#5</b>  | 69.40(6)  | O(8)-B(3)-O(6)     | 108.4(2)   |
| <b>O(10)#3-Gd(1)-O(9)#5</b> | 159.84(6) | O(5)-B(3)-O(6)     | 111.7(2)   |
| <b>O(7)#3-Gd(1)-O(9)#5</b>  | 130.58(5) | O(8)-B(4)-O(4)#8   | 113.7(2)   |
| <b>O(4)#2-Gd(1)-O(9)#5</b>  | 117.43(5) | O(8)-B(4)-O(3)#6   | 109.6(2)   |
| <b>O(4)#4-Gd(1)-O(9)#5</b>  | 52.23(5)  | O(4)#8-B(4)-O(3)#6 | 112.6(2)   |
| <b>O(1)-Gd(1)-O(3)#4</b>    | 86.37(6)  | O(8)-B(4)-O(9)     | 109.1(2)   |
| <b>O(1)#1-Gd(1)-O(3)#4</b>  | 121.49(5) | O(4)#8-B(4)-O(9)   | 103.11(19) |
| <b>O(2)#1-Gd(1)-O(3)#4</b>  | 63.79(5)  | O(3)#6-B(4)-O(9)   | 108.49(19) |
| <b>O(5)#2-Gd(1)-O(3)#4</b>  | 148.56(5) | O(9)-B(5)-O(7)     | 121.3(2)   |
| <b>O(10)#3-Gd(1)-O(3)#4</b> | 68.42(5)  | O(9)-B(5)-O(10)    | 125.6(2)   |
| <b>O(7)#3-Gd(1)-O(3)#4</b>  | 85.67(5)  | O(7)-B(5)-O(10)    | 113.1(2)   |

Symmetry transformations used to generate equivalent atoms:

|                            |                             |
|----------------------------|-----------------------------|
| #1 $-x+1/2, y+1/2, -z+1/2$ | #2 $-x+1, -y+1, -z+1$       |
| #3 $x-1/2, -y+3/2, z-1/2$  | #4 $x-1/2, -y+1/2, z-1/2$   |
| #5 $x, y, z-1$             | #6 $-x+1/2, y+1/2, -z+3/2$  |
| #7 $-x+1/2, y-1/2, -z+3/2$ | #8 $x-1/2, -y+1/2, z+1/2$   |
| #9 $-x, -y+1, -z+1$        | #10 $-x+1/2, y-1/2, -z+1/2$ |
| #11 $x+1/2, -y+3/2, z+1/2$ | #12 $x+1/2, -y+1/2, z+1/2$  |
| #13 $x+1/2, -y+1/2, z-1/2$ | #14 $x, y, z+1$             |

**Fig. S1.** The picture is under a microscope of (a)  $\text{YZnB}_5\text{O}_{10}$ , (b)  $\text{GdZnB}_5\text{O}_{10}$ .

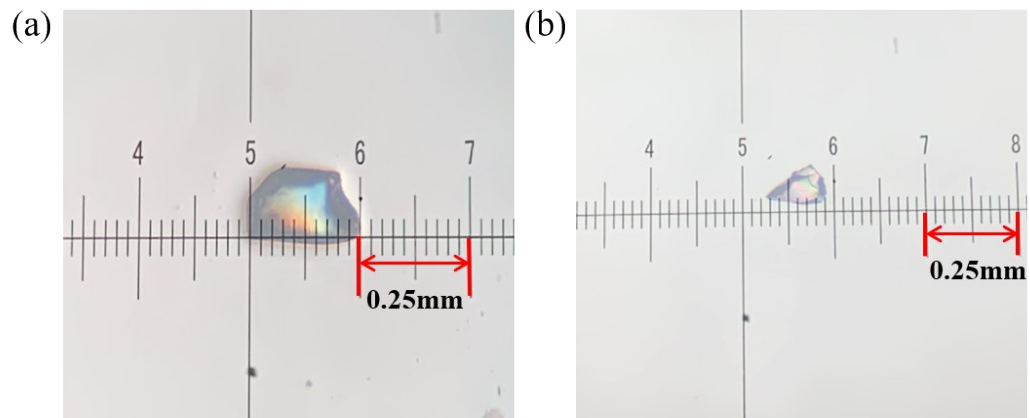



**Fig. S2.** Calculated and experimental XRD patterns of (a)  $\text{YZnB}_5\text{O}_{10}$ , (b)  $\text{GdZnB}_5\text{O}_{10}$ .

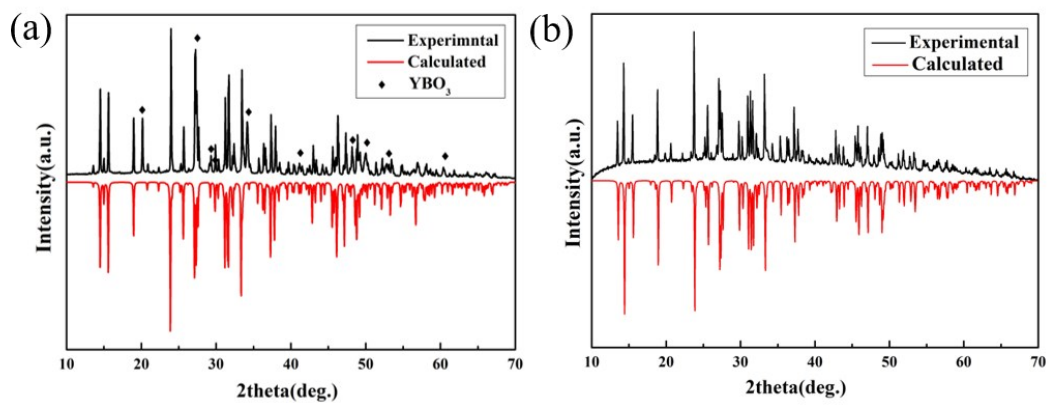

**Fig. S3.** (a) Cation coordination environment of Zn in the  $\text{YZnB}_5\text{O}_{10}$ , (b) Cation coordination environment of Y in the  $\text{YZnB}_5\text{O}_{10}$ .

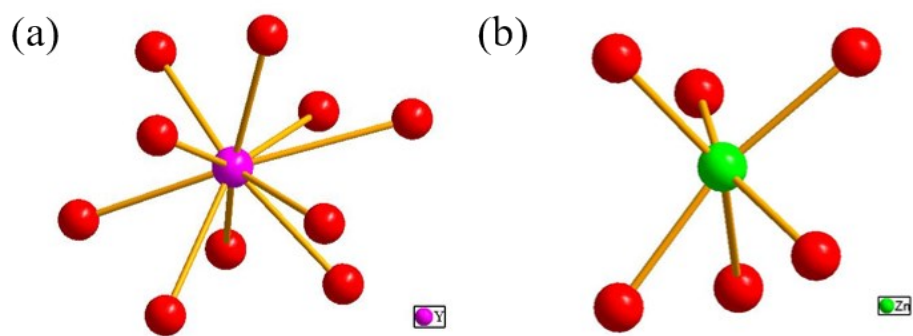

Supplement: d0nj05763k1.pdf [file d0nj05763k1.pdf]
